# Supplementary material for: Towards circular fashion – transforming pulp mills into hubs for textile recycling
Source: Royal Society of Chemistry journal article supplement (doi:10.1039/d1ra00168j), 2021-01-01
Supplement: d1ra00168j1.pdf [file d1ra00168j1.pdf]

**Table 1.** Composition of the pretreated materials at different conditions, which were used for the evaluation of different conditioning strategies. Numbers in parenthesis indicate standard deviation.

| Sample                                            | Cellulose (%) | Non-cellulosic residue (%) | Residual salts (%) |
|---------------------------------------------------|---------------|----------------------------|--------------------|
| 5% Na <sub>2</sub> CO <sub>3</sub> , 150 °C, 2 h  | 87.9 (1.2)    | 3.3 (1.3)                  | 11.9 (2.3)         |
| 10% Na <sub>2</sub> CO <sub>3</sub> , 150 °C, 2 h | 86.1 (3.6)    | 1.2 (1.0)                  | 13.3 (0.7)         |
| 5% Na <sub>2</sub> CO <sub>3</sub> , 120 °C, 4 h  | 86.7 (0.4)    | 1.9 (0.4)                  | 12.9 (0.4)         |
| 5% NaOH, 150 °C, 2 h                              | 87.1 (1.9)    | 1.5 (0.1)                  | 9.8 (1.0)          |

**Table 2.** Composition of the pretreated materials with 5% Na<sub>2</sub>CO<sub>3</sub> at 100 °C and different residence times. Numbers in parenthesis indicate standard deviation.

| Sample | Cellulose (%) | Non-cellulosic residue (%) | Residual salts (%) |
|--------|---------------|----------------------------|--------------------|
| 1 h    | 88.8 (3.2)    | 5.7 (3.0)                  | 6.0 (0.4)          |
| 2 h    | 91.1 (1.1)    | 2.4 (0.6)                  | 8.0 (0.7)          |
| 4 h    | 89.8 (2.0)    | 5.4 (2.6)                  | 7.5 (0.2)          |
| 6 h    | 86.7 (8.0)    | 2.5 (1.2)                  | 8.7 (0.8)          |
| 8 h    | 88.4 (5.6)    | 3.8 (1.2)                  | 9.1 (1.3)          |

**Table 3.** Composition of the pretreated materials with 5% Na<sub>2</sub>CO<sub>3</sub> at 150 °C and different residence times. Numbers in parenthesis indicate standard deviation.

| Sample | Cellulose (%) | Non-cellulosic residue (%) | Residual salts (%) |
|--------|---------------|----------------------------|--------------------|
| 1 h    | 90.3 (0.8)    | 1.5 (0.7)                  | 8.8 (0.4)          |
| 2 h    | 87.9 (1.2)    | 3.3 (1.3)                  | 11.9 (2.3)         |
| 4 h    | 87.0 (2.5)    | 1.5 (0.2)                  | 11.5 (4.7)         |
| 6 h    | 90.0 (2.1)    | 0.8 (0.1)                  | 9.4 (1.2)          |
| 8 h    | 90.3 (2.1)    | 1.5 (0.1)                  | 8.8 (0.3)          |

**Table 4.** Composition of the pretreated materials with 5% Na<sub>2</sub>CO<sub>3</sub> at 200 °C and different residence times. Numbers in parenthesis indicate standard deviation.

| Sample | Cellulose (%) | Non-cellulosic residue (%) | Residual salts (%) |
|--------|---------------|----------------------------|--------------------|
| 1 h    | 90.9 (0.4)    | 0.9 (0.1)                  | 10.3 (1.2)         |
| 2 h    | 85.2 (0.2)    | 0.9 (0.1)                  | 14.2 (0.1)         |
| 4 h    | 87.0 (1.4)    | 0.8 (0.1)                  | 12.5 (2.7)         |
| 6 h    | 88.2 (0.5)    | 0.7 (0.2)                  | 11.9 (5.9)         |
| 8 h    | 88.2 (0.3)    | 1.2 (0.6)                  | 11.2 (0.5)         |

**Table 5.** Composition of the pretreated material with different combinations of salts and actual green liquor from a pulp mill. Numbers in parenthesis indicate standard deviation.

| Sample                                                  | Cellulose (%) | Non-cellulosic residue (%) | Residual salts (%) |
|---------------------------------------------------------|---------------|----------------------------|--------------------|
| Na <sub>2</sub> CO <sub>3</sub> +Na <sub>2</sub> S      | 81.4 (0.3)    | 0.9 (0.1)                  | 16.4 (1.9)         |
| Na <sub>2</sub> CO <sub>3</sub> +NaOH                   | 80.7 (0.8)    | 0.7 (0.1)                  | 15.1 (3.0)         |
| Na <sub>2</sub> CO <sub>3</sub> +Na <sub>2</sub> S+NaOH | 85.8 (0.2)    | 0.6 (0.2)                  | 12.2 (0.2)         |
| Green liquor                                            | 83.1 (0.2)    | 1.4 (0.2)                  | 15.5 (0.4)         |
